# Supplementary material for: γH2AX, a DNA Double-Strand Break Marker, Correlates with PD-L1 Expression in Smoking-Related Lung Adenocarcinoma
Source: MDPI journal article supplement (doi:10.3390/ijms23126679), 2022-06-15
Supplement: s1 [file s1]

## Supplementary materials

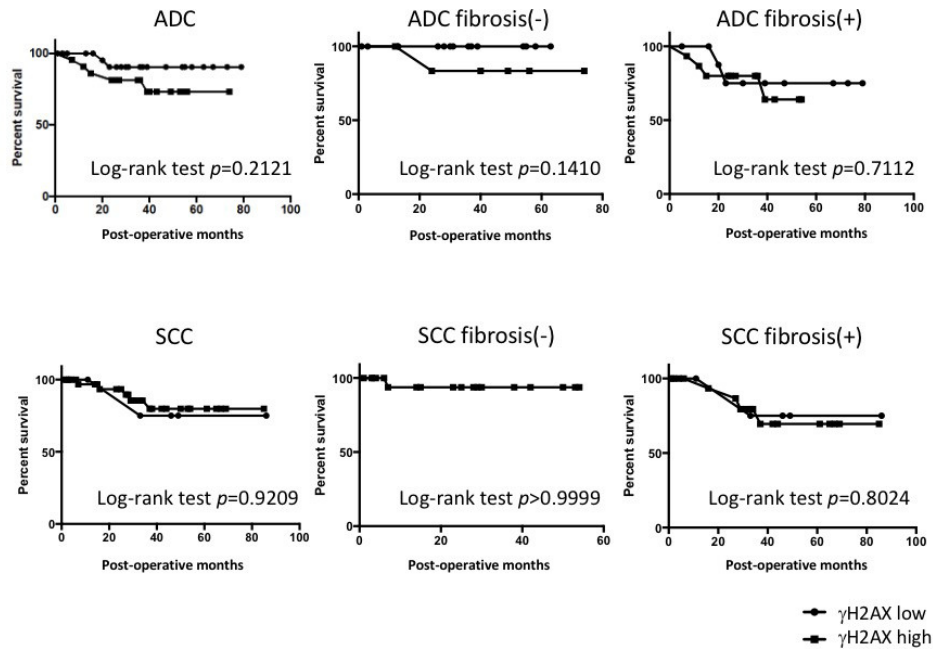

**Figure S1.**  $\gamma$ H2AX expression and post-operative survival. No statistical significance in terms of patient survival was detected in high/low  $\gamma$ H2AX expression of adenocarcinoma, adenocarcinoma without fibrosis, or adenocarcinoma with fibrosis.

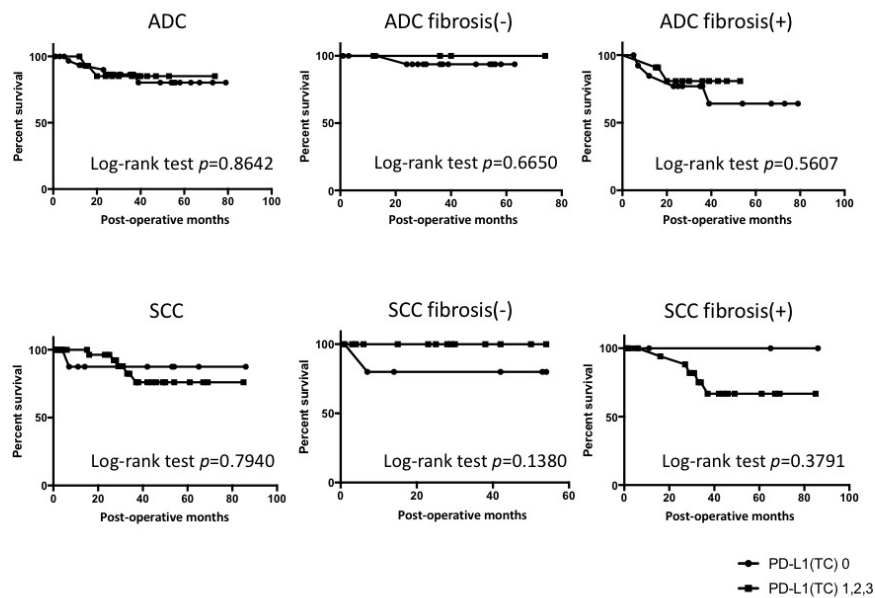

**Figure S2.** PD-L1 expression and post-operative survival. No statistical significance in terms of patient survival was detected in high/low PD-L1 expression of adenocarcinoma, adenocarcinoma without fibrosis, or adenocarcinoma with fibrosis.
